# Supplementary material for: High lithium storage properties in a manganese sulfide anode via an intercalation-cum-conversion reaction
Source: Royal Society of Chemistry journal article supplement (doi:10.1039/d0ta05758d), 2020-01-01
Supplement: d0ta05758d1.pdf [file d0ta05758d1.pdf]

## Supplementary Information

### High lithium storage properties in manganese sulfide anode via an intercalation-cum-conversion reaction

Seulgi Lee,<sup>‡</sup> Moonsu Song,<sup>‡</sup> Sungjin Kim, Vinod Mathew, Balaji Sambandam, Jang-Yeon Hwang\* and Jaekook Kim\*

Department of Materials Science and Engineering, Chonnam National University, Gwangju 61186, South Korea

#### Author Information

<sup>‡</sup>These authors contribute equally to this work.

#### Corresponding Author

\*E-mail: [hjy@jnu.ac.kr](mailto:hjy@jnu.ac.kr); [jaekook@chonnam.ac.kr](mailto:jaekook@chonnam.ac.kr)

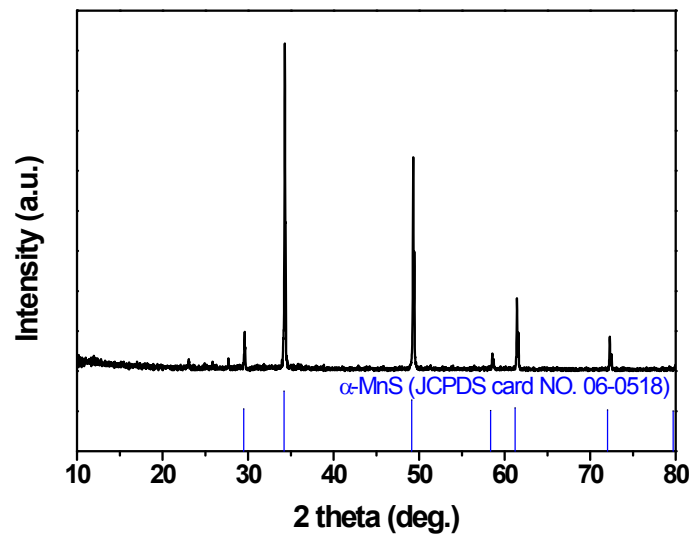

**Fig. S1** XRD pattern of the commercial MnS powder.

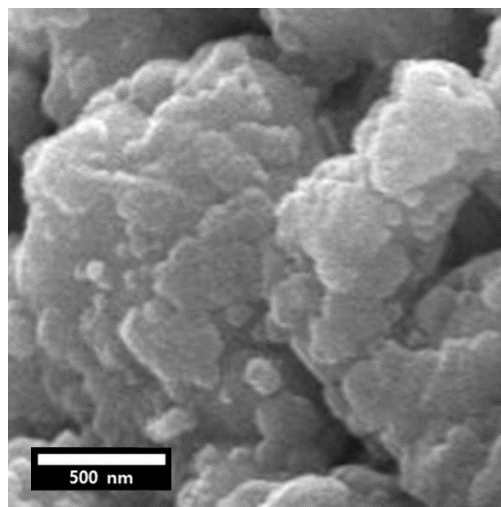

**Fig. S2** SEM image of the commercial MnS powder.

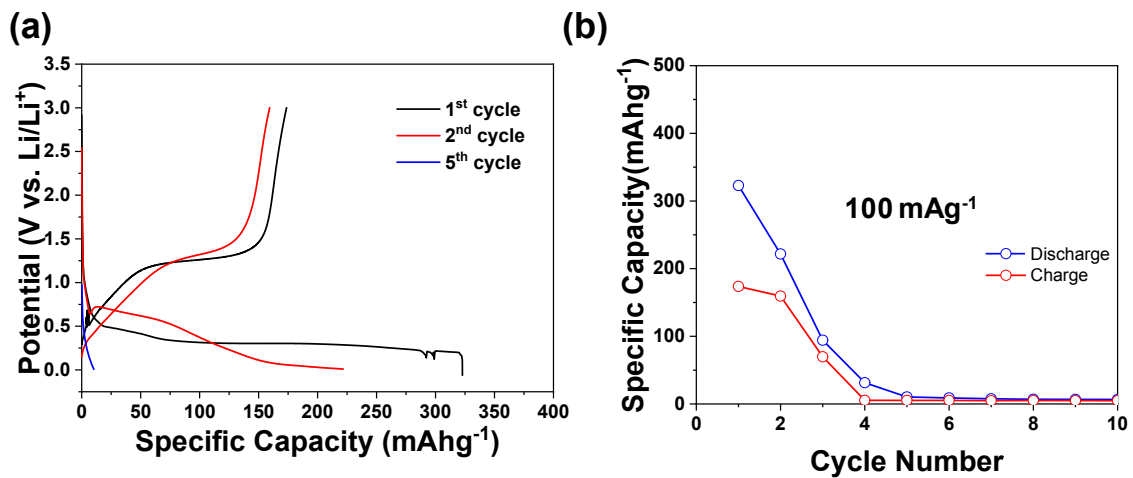

Fig. S3 (a) Discharge/charge curves and (b) cycle performance of the commercial MnS electrode.

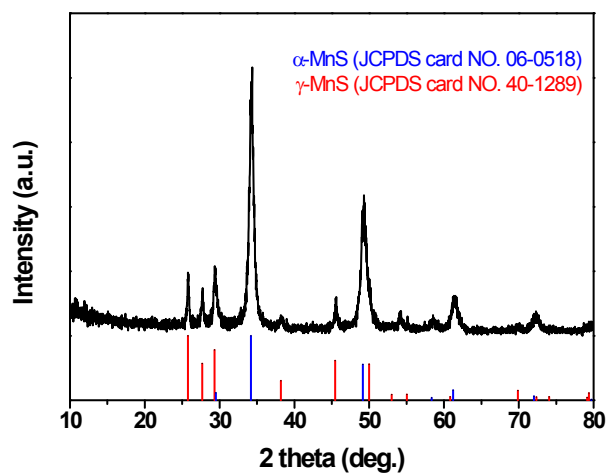

**Fig. S4** XRD pattern of the as-prepared MnS after polyol reaction.

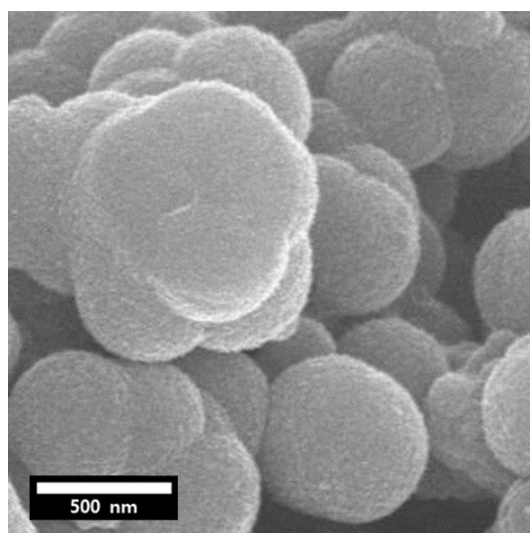

**Fig. S5** SEM image of the as-prepared MnS powder.

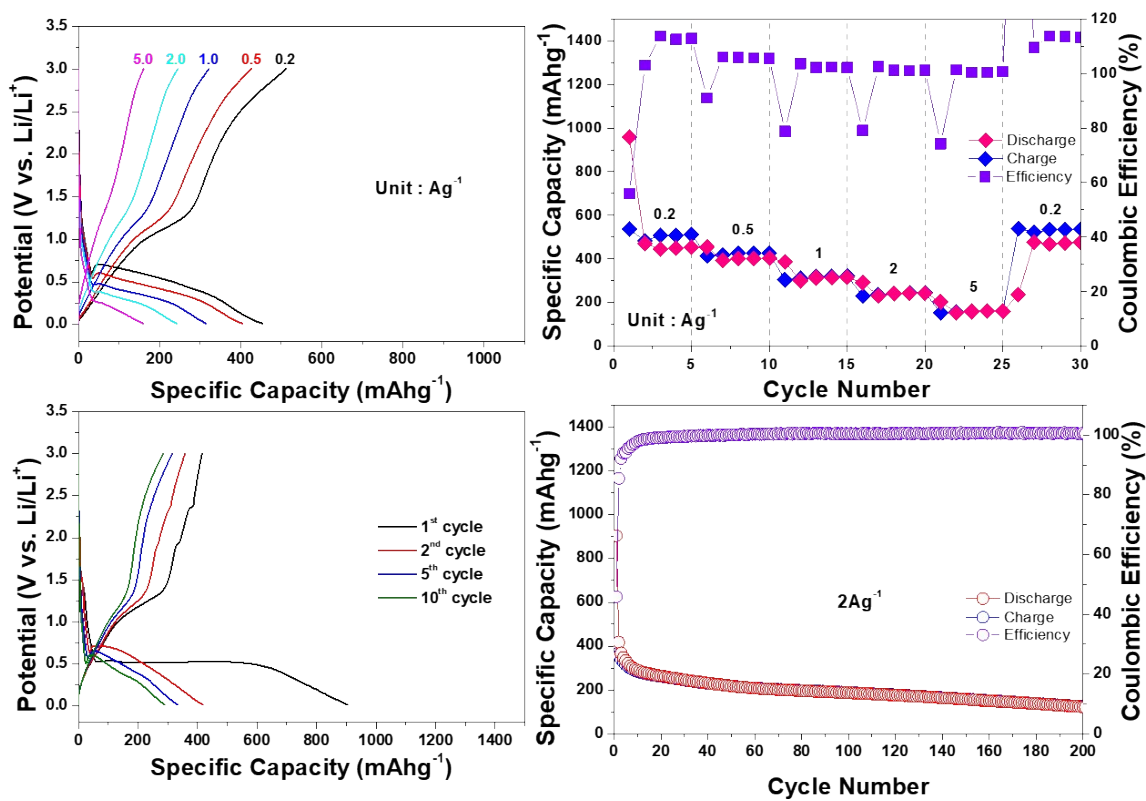

**Fig. S6** Electrochemical properties of the as-prepared MnS electrode including discharge/charge curves at different current densities, C-rate and Cycling performances.

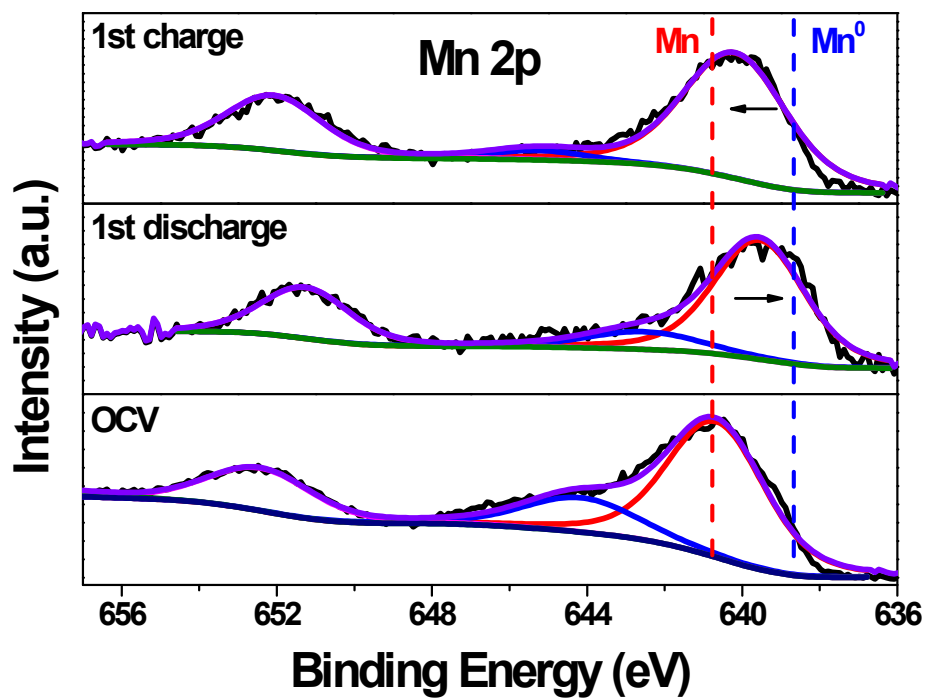

**Fig. S7** Ex situ Mn XPS spectra  $\alpha$ -MnS@NS-C electrode at OCV and fully discharged and charged states of the initial cycle.

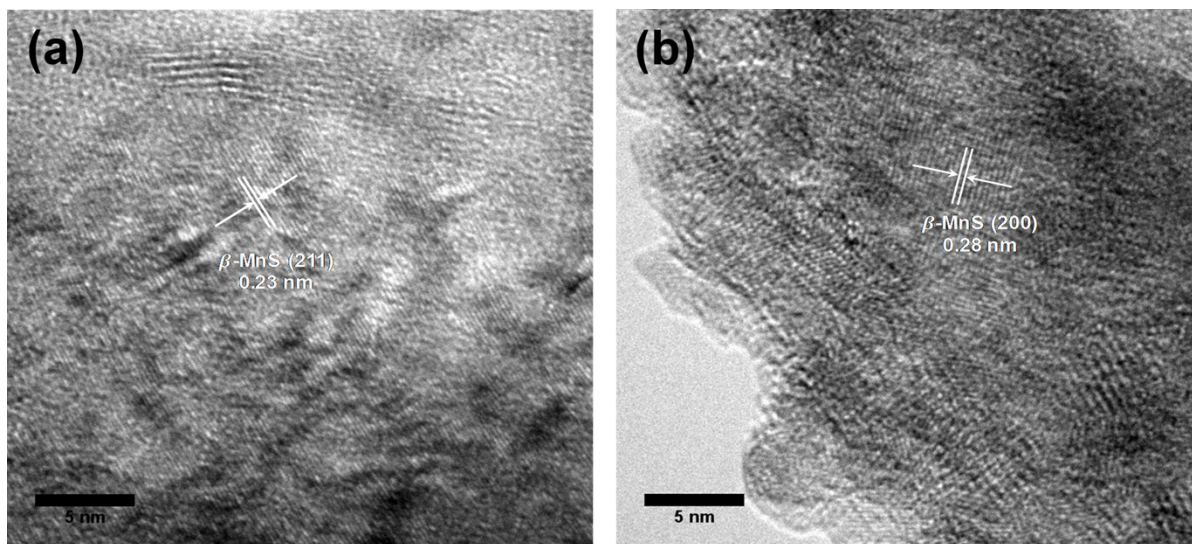

**Fig. S8.** Ex situ HRTEM images of  $\alpha$ -MnS@NS-C after initial (a) discharged and (b) charged states.

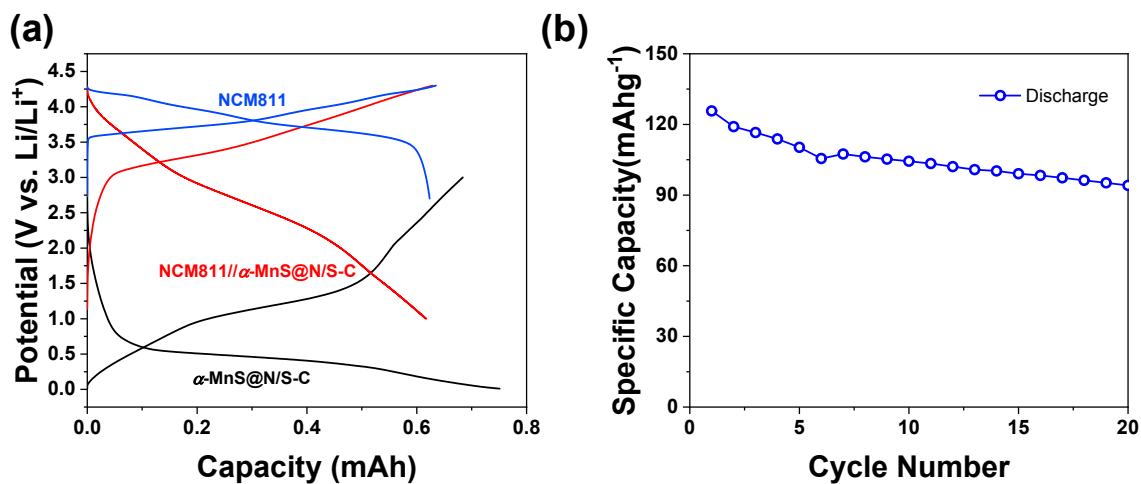

**Fig. S9.** (a) Optimization of potential window for the full cell using half-cell data for the NCM811 cathode and the  $\alpha$ -MnS@NS-C electrode; Electrochemical performance of  $\alpha$ -MnS@NS-C/1 M LiPF<sub>6</sub>-EC-DMC / NCM 811 full-cell and (b) cyclability plot in the potential range of 1 – 4.3 V at 20 mA g<sup>-1</sup>.
